# Supplementary material for: A single-cell map of dynamic chromatin landscapes of immune cells in renal cell carcinoma
Source: PubMed Central journal article supplement (PMC9325682; doi:10.1038/s43018-022-00391-0), 2022-06-06
Supplement: 43018_2022_391_MOESM1_ESM.pdf [file 43018_2022_391_MOESM1_ESM.pdf]

---

**Supplementary information**

---

**A single-cell map of dynamic chromatin landscapes of immune cells in renal cell carcinoma**

---

In the format provided by the authors and unedited

| Source                 | Assay                                   | Subject ID | Stage     | Age | Sex | scATAC-seq                             |       |       |                        | scRNA-seq                              |        |        |                        |
|------------------------|-----------------------------------------|------------|-----------|-----|-----|----------------------------------------|-------|-------|------------------------|----------------------------------------|--------|--------|------------------------|
|                        |                                         |            |           |     |     | Total filtered CD45 <sup>+</sup> cells | Tumor | PBMC  | Normal adjacent tissue | Total filtered CD45 <sup>+</sup> cells | Tumor  | PBMC   | Normal adjacent tissue |
| Avaden                 | Single-cell analysis                    | 1002300    | T1b,N0,M0 | 79  | F   | 6,854                                  | 3,179 | 2,011 | 1,664                  | 27,843                                 | 10,010 | 9,109  | 8,724                  |
| Avaden                 | Single-cell analysis                    | 2001055    | T1b,N0,M0 | 60  | M   | 2,179                                  | 1,085 | 1,094 | N/A                    | N/A                                    | N/A    | N/A    | N/A                    |
| Avaden                 | Single-cell analysis                    | 2001077    | T1a,N0,M0 | 61  | M   | 3,066                                  | 1,677 | 1,389 | N/A                    | N/A                                    | N/A    | N/A    | N/A                    |
| Avaden                 | Single-cell analysis                    | 2001215    | T1a,N0,M0 | 65  | M   | 3,744                                  | 2,188 | 1,556 | N/A                    | N/A                                    | N/A    | N/A    | N/A                    |
| Avaden                 | Single-cell analysis                    | 2001221    | T1a,N0,M0 | 64  | M   | 2,613                                  | 1,910 | 703   | N/A                    | N/A                                    | N/A    | N/A    | N/A                    |
| Avaden                 | Single-cell analysis                    | 7001031    | T1a,N0,M0 | 45  | M   | 4,123                                  | 1,858 | 1,907 | 358                    | 21,114                                 | 13,340 | 3,861  | 3,913                  |
| Avaden                 | Single-cell analysis,<br>Flow cytometry | 7001025    | T1b,N0,M0 | 45  | M   | 5,084                                  | 1,892 | 1,739 | 1,453                  | 34,215                                 | 9,839  | 15,708 | 8,668                  |
| Avaden                 | Single-cell analysis,<br>Flow cytometry | 1002310    | T1b,N0,M0 | 65  | M   | 7,028                                  | 3,062 | 2,395 | 1,571                  | 24,066                                 | 7,787  | 9,485  | 6,794                  |
| Discovery Life science | Flow cytometry                          | 120891915  | I         | 72  | M   |                                        |       |       |                        |                                        |        |        |                        |
| Discovery Life science | Flow cytometry                          | 110003259  | I         | 52  | M   |                                        |       |       |                        |                                        |        |        |                        |
| Discovery Life science | Flow cytometry                          | 200003349  | I         | 49  | M   |                                        |       |       |                        |                                        |        |        |                        |
| Discovery Life science | Flow cytometry                          | 121576700  | I         | 66  | M   |                                        |       |       |                        |                                        |        |        |                        |
| Discovery Life science | Flow cytometry                          | 110042469  | I         | 56  | M   |                                        |       |       |                        |                                        |        |        |                        |
| Discovery Life science | Flow cytometry                          | 200002022  | I         | 76  | F   |                                        |       |       |                        |                                        |        |        |                        |
| Discovery Life science | Flow cytometry                          | 200001101  | I         | 65  | F   |                                        |       |       |                        |                                        |        |        |                        |
| Discovery Life science | Flow cytometry                          | 110003572  | I         | 68  | F   |                                        |       |       |                        |                                        |        |        |                        |
| Discovery Life science | Flow cytometry                          | 200000629  | I         | 57  | M   |                                        |       |       |                        |                                        |        |        |                        |
| Discovery Life science | Flow cytometry                          | 110002687  | I         | 52  | M   |                                        |       |       |                        |                                        |        |        |                        |
| Discovery Life science | Flow cytometry                          | 121222634  | I         | 28  | M   |                                        |       |       |                        |                                        |        |        |                        |
| Discovery Life science | Flow cytometry                          | 200000912  | I         | 47  | M   |                                        |       |       |                        |                                        |        |        |                        |
| Discovery Life science | Flow cytometry                          | 121441278  | I         | 61  | M   |                                        |       |       |                        |                                        |        |        |                        |
| Discovery Life science | Flow cytometry                          | 110042455  | I         | 62  | M   |                                        |       |       |                        |                                        |        |        |                        |

**Supplementary Table 1. Patient information, sample source and cell numbers for the ccRCC samples used in this study.**
