# Supplementary material for: A single-cell map of dynamic chromatin landscapes of immune cells in renal cell carcinoma
Source: PubMed Central journal article supplement (PMC9325682; doi:10.1038/s43018-022-00391-0), 2022-06-06
Supplement: 43018_2022_391_MOESM2_ESM.pdf [file 43018_2022_391_MOESM2_ESM.pdf]

## Reporting Summary

Nature Portfolio wishes to improve the reproducibility of the work that we publish. This form provides structure for consistency and transparency in reporting. For further information on Nature Portfolio policies, see our [Editorial Policies](#) and the [Editorial Policy Checklist](#).

### Statistics

For all statistical analyses, confirm that the following items are present in the figure legend, table legend, main text, or Methods section.

n/a Confirmed

- The exact sample size ( $n$ ) for each experimental group/condition, given as a discrete number and unit of measurement
- A statement on whether measurements were taken from distinct samples or whether the same sample was measured repeatedly
- The statistical test(s) used AND whether they are one- or two-sided  
*Only common tests should be described solely by name; describe more complex techniques in the Methods section.*
- A description of all covariates tested
- A description of any assumptions or corrections, such as tests of normality and adjustment for multiple comparisons
- A full description of the statistical parameters including central tendency (e.g. means) or other basic estimates (e.g. regression coefficient) AND variation (e.g. standard deviation) or associated estimates of uncertainty (e.g. confidence intervals)
- For null hypothesis testing, the test statistic (e.g.  $F$ ,  $t$ ,  $r$ ) with confidence intervals, effect sizes, degrees of freedom and  $P$  value noted  
*Give  $P$  values as exact values whenever suitable.*
- For Bayesian analysis, information on the choice of priors and Markov chain Monte Carlo settings
- For hierarchical and complex designs, identification of the appropriate level for tests and full reporting of outcomes
- Estimates of effect sizes (e.g. Cohen's  $d$ , Pearson's  $r$ ), indicating how they were calculated

*Our web collection on [statistics for biologists](#) contains articles on many of the points above.*

### Software and code

Policy information about [availability of computer code](#)

Data collection

Data analysis

For manuscripts utilizing custom algorithms or software that are central to the research but not yet described in published literature, software must be made available to editors and reviewers. We strongly encourage code deposition in a community repository (e.g. GitHub). See the Nature Portfolio [guidelines for submitting code & software](#) for further information.

## Data

Policy information about [availability of data](#)

All manuscripts must include a [data availability statement](#). This statement should provide the following information, where applicable:

- Accession codes, unique identifiers, or web links for publicly available datasets
- A description of any restrictions on data availability
- For clinical datasets or third party data, please ensure that the statement adheres to our [policy](#)

Single-cell ATAC-seq, RNA-seq, and TCR-seq data that support the findings of this study have been deposited in the Gene Expression Omnibus (GEO) under accession code GSE181064.

Bulk RNA-seq data for the TCGA ccRCC cohort (KIRC) was obtained through the Broad GDAC Firehose (<https://gdac.broadinstitute.org/>), and clinical data for TCGA KIRC was obtained from cBioPortal for Cancer Genomics (<https://www.cbioportal.org/>) (Cerami et al, Cancer Discov, 2012; Gao et al, Sci Signal, 2013). Bulk RNA-seq data and clinical data for the CheckMate cohorts were obtained from (Braun et al, Cancer Cell, 2021) human GRCh38 genome assembly was used for read mapping.

## Field-specific reporting

Please select the one below that is the best fit for your research. If you are not sure, read the appropriate sections before making your selection.

- Life sciences       Behavioural & social sciences       Ecological, evolutionary & environmental sciences

For a reference copy of the document with all sections, see [nature.com/documents/nr-reporting-summary-flat.pdf](https://nature.com/documents/nr-reporting-summary-flat.pdf)

## Life sciences study design

All studies must disclose on these points even when the disclosure is negative.

|                 |                                                                                                                                                                                                                                                      |
|-----------------|------------------------------------------------------------------------------------------------------------------------------------------------------------------------------------------------------------------------------------------------------|
| Sample size     | No statistical method was used to pre-determine sample sizes but our sample sizes are similar to those reported in previous publications (Bi et al., Cancer Cell, 2021; Braun et al., Cancer Cell, 2021; Krishna et al, Cancer Cell, 2021)           |
| Data exclusions | No data were excluded from the analyses                                                                                                                                                                                                              |
| Replication     | Due to the limited biological material available from patients, replications was no possible. However, for sequencing studies and flow cytometry, multiple independent patient samples were tested as indicated in text, figure legends and methods. |
| Randomization   | As no therapeutic interventions were undertaken, randomization is not relevant.                                                                                                                                                                      |
| Blinding        | The methods employed in this study involve unbiased profiling of the epigenome/transcriptome, and flow cytometry. There was no therapeutic intervention or expected outcome prior to the corresponding analysis, therefore blinding is not relevant  |

## Reporting for specific materials, systems and methods

We require information from authors about some types of materials, experimental systems and methods used in many studies. Here, indicate whether each material, system or method listed is relevant to your study. If you are not sure if a list item applies to your research, read the appropriate section before selecting a response.

### Materials & experimental systems

| n/a                                 | Involved in the study                                           |
|-------------------------------------|-----------------------------------------------------------------|
| <input type="checkbox"/>            | <input checked="" type="checkbox"/> Antibodies                  |
| <input checked="" type="checkbox"/> | <input type="checkbox"/> Eukaryotic cell lines                  |
| <input checked="" type="checkbox"/> | <input type="checkbox"/> Palaeontology and archaeology          |
| <input checked="" type="checkbox"/> | <input type="checkbox"/> Animals and other organisms            |
| <input type="checkbox"/>            | <input checked="" type="checkbox"/> Human research participants |
| <input checked="" type="checkbox"/> | <input type="checkbox"/> Clinical data                          |
| <input checked="" type="checkbox"/> | <input type="checkbox"/> Dual use research of concern           |

### Methods

| n/a                                 | Involved in the study                              |
|-------------------------------------|----------------------------------------------------|
| <input checked="" type="checkbox"/> | <input type="checkbox"/> ChIP-seq                  |
| <input type="checkbox"/>            | <input checked="" type="checkbox"/> Flow cytometry |
| <input checked="" type="checkbox"/> | <input type="checkbox"/> MRI-based neuroimaging    |

## Antibodies

Antibodies used

Listed as - Antibody: Supplier, Clone name, Fluorochrome, Catalogue number, Dilution  
 Flow cytometry antibodies:  
 PD-1: BD Biosciences, EH12.1, BUV737, 612792, 1:50  
 TOX: Miltenyi, REA473, PE, 130-120-716, 1:50

EOMES: Invitrogen, WD1928, PE-eFluor610, 61-4877-42, 1:50  
 CD39: BD Bioscience, TU66, BUV661, 749967, 1:50  
 TIM3: BioLegend, F38-2E2, BV650, 345028, 1:100  
 4-1BB: BD Bioscience, 4B4-1, BV480, 746700, 1:50  
 CD95 (FAS): BioLegend, DX2, APC/Fire750, 305638, 1:50  
 TRAF1: BD Bioscience, 1F3, eFluor660, 566738, 1:25  
 PRF1: BioLegend, B-D48, AF700, 353324, 1:100  
 TCF7: Cell Signaling, C63D9, Pacific Blue, 9066S, 1:50  
 CD45RA: BD Bioscience, HI100, BUV395, 740298, 1:100  
 CD4: BioLegend, SK3, SparkBlue 550, 344656, 1:400  
 CD3: BioLegend, UCHT1, BV570, 300436, 1:25  
 CD8: BD Bioscience, RPA-T8, BUV805, 749366, 1:100  
 Ki67: BD Bioscience, B56, BV711, 563755, 1:200  
 FAM-VAD-FMK poly caspases: Invitrogen, V35117

## Validation

All the antibodies used in this study were commercial antibodies, with validation procedures from the manufacturer described in the following sites: <https://www.biolegend.com>; <https://www.bdbiosciences.com/en-us>; <https://www.thermofisher.com/us/en/home/brands/invitrogen.html>; <https://www.cellsignal.com>; <https://www.miltenyibiotec.com/US-en/#gref>

## Human research participants

Policy information about [studies involving human research participants](#)

## Population characteristics

All patients had Stage I renal cell carcinoma with clear cell histology. Information about the age and sex of the patients is provided in Supplementary Table 1. None of the patients received therapy prior to tumor resection

## Recruitment

There is no evidence that this study was prone to self-selection bias

## Ethics oversight

Consented patient samples were procured from commercial vendors (Avaden BioSciences and Discovery Life Sciences)

Note that full information on the approval of the study protocol must also be provided in the manuscript.

## Flow Cytometry

### Plots

Confirm that:

- The axis labels state the marker and fluorochrome used (e.g. CD4-FITC).
- The axis scales are clearly visible. Include numbers along axes only for bottom left plot of group (a 'group' is an analysis of identical markers).
- All plots are contour plots with outliers or pseudocolor plots.
- A numerical value for number of cells or percentage (with statistics) is provided.

### Methodology

## Sample preparation

Consented patient samples were procured from commercial vendors (Avaden BioSciences and Discovery Life Sciences). The sample processing protocol is described in Methods

## Instrument

BD FACSymphony A5, Cytex Aurora

## Software

OMIQ

## Cell population abundance

The abundance of CD45+ determined by testing the sorted cells with FACS, reached >99%

## Gating strategy

Gating strategy used to derive data in Fig. 4e. Viable cells were gated for CD45+ cells, T cells (CD2+CD3+), CD3+CD8+CD4- cells, and the % cells expressing PD-1, TOX, 4-1BB, FAS, TRAF1 and combinations was assessed. Positive and negative expression was based on isotype and FMO controls.

- Tick this box to confirm that a figure exemplifying the gating strategy is provided in the Supplementary Information.
